# Supplementary material for: Preparation and Characterization of Plant Protein Adhesives with Strong Bonding Strength and Water Resistance
Source: MDPI journal article supplement (doi:10.3390/foods11182839), 2022-09-14
Supplement: s1 [file s1]

## Preparation and Characterization of Plant Protein Adhesives with Strong Bonding Strength and Water Resistance

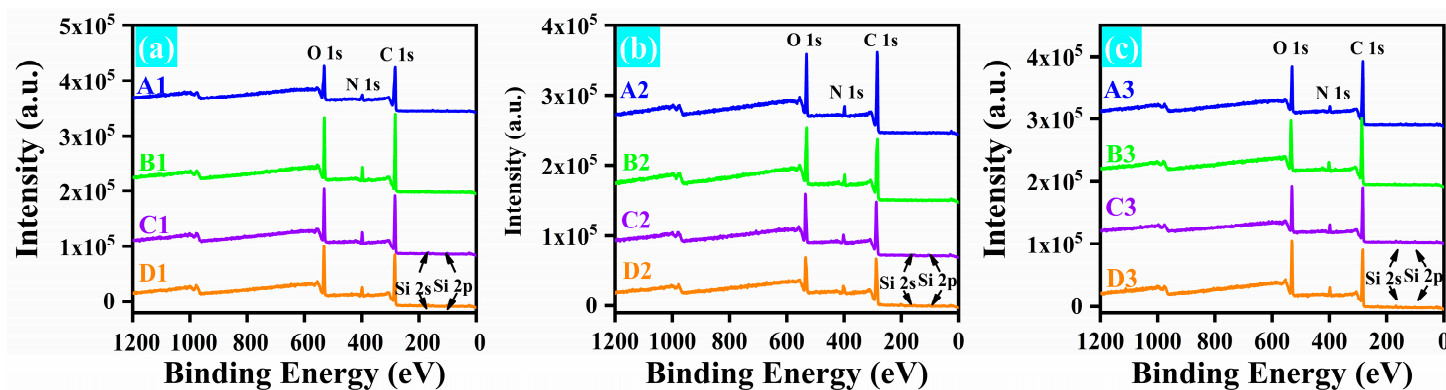

**Figure S1.** XPS spectra of a broad scan survey of (a) A1-pure HPMP, B1-SDS/HPMP, C1- SDS/nSiO<sub>2</sub>/HPMP, and D1-HPMP adhesives. (b) A2-pure SBMP, B2-SDS/SBMP, C2- SDS/nSiO<sub>2</sub>/SBMP, and D2-SBMP adhesives. (c) A3-pure CSMP, B3-SDS/CSMP, C3- SDS/nSiO<sub>2</sub>/CSMP, and D3-CSMP adhesives.
